# Supplementary material for: Neutrophil Extracellular Traps Do Not Induce Injury and Inflammation in Well-Differentiated RSV-Infected Airway Epithelium
Source: MDPI journal article supplement (doi:10.3390/cells11050785), 2022-02-24
Supplement: s1 [file s1]

## Supplemental Data

**Supplemental Table S1:** List of Genes included in the CodeSet analysis

**Legend:** # number in the gene set. I = gene involved in immune system (NanoString); A = gene involved in regulated cell death or apoptosis (NanoString).

**Supplemental Table S2: Cytokine release for the different experimental groups**

Data are presented as mean (SD) in pg/ml. One-way ANOVA for multiple comparisons F, (p).

**Supplemental Table S3: Directed differential expression (Gene set analysis)**

**Legend:** NETs: neutrophil extracellular traps, US: unstimulated neutrophil supernatant, RSV: respiratory syncytial virus. Ped\*: pediatric.

**Supplemental Table S4: The five most up- or downregulated genes per comparison** are displayed, or more in the case more were significantly up- or downregulated. Legend \* adjusted p <0.05 \*\* adjusted p <0.01, \*\*\* adjusted p <0.001. NETs: neutrophil extracellular traps, US: unstimulated neutrophil supernatant, RSV: respiratory syncytial virus

**Supplemental Figure S1: RSV replication in HAE cultures by RT-qPCR in adult and pediatric HAE cultures.**

**Supplemental Figure S2: Confocal Images of Unstimulated Neutrophils and NETs**

**Legend:** Upper row: neutrophils and NETs stained for Citrullinated Histone 3 (yellow), lower row neutrophil elastase (NE, magenta), and DNA (DAPI, blue).

**Supplemental Table S1:** List of Genes included in the CodeSet analysis

**Legend:** # number in the gene set. I = gene involved in immune system (NanoString); A = gene involved in regulated cell death or apoptosis (NanoString).

| #  | Gene       | I | A | #  |                                               | I | A | #  |            | I | A |
|----|------------|---|---|----|-----------------------------------------------|---|---|----|------------|---|---|
| 1  | ABCF1 (HK) |   |   | 39 | CASP8                                         | x | x | 77 | RPLP0 (HK) |   |   |
| 2  | ABL1       | X |   | 40 | CASP9                                         |   |   | 78 | TNF        | X |   |
| 3  | AIFM1      |   |   | 41 | CD27                                          | X |   | 79 | TNFRSF10A  |   | X |
| 4  | AKT1       | X | X | 42 | CD40                                          | X |   | 80 | TNFRSF10B  |   | X |
| 5  | APAF1      | X | X | 43 | CD40LG                                        | X |   | 81 | TNFRSF11B  | X |   |
| 6  | BAD        |   | X | 44 | CD70                                          | X |   | 82 | TNFRSF1A   | X |   |
| 7  | BAG1       |   |   | 45 | CFLAR                                         |   | X | 83 | TNFRSF1B   | X |   |
| 8  | BAG3       |   |   | 46 | CIDEA                                         |   |   | 84 | TNFRSF21   |   |   |
| 9  | BAK1       |   |   | 47 | CIDEB                                         |   |   | 85 | TNFRSF25   | X |   |
| 10 | BAX        |   | X | 48 | CRADD                                         |   |   | 86 | TNFRSF9    | X |   |
| 11 | BBC3       |   | X | 49 | CYCS                                          |   | X | 87 | TNFSF10    |   | X |
| 12 | BCL10      | X |   | 50 | DAPK1                                         |   | X | 88 | TNFSF8     | X |   |
| 13 | BCL2       | X | X | 51 | DAXX                                          |   |   | 89 | TP53       | X | X |
| 14 | BCL2A1     |   |   | 52 | DFFA                                          |   | X | 90 | TP53AIP1   |   |   |
| 15 | BCL2L1     | X | X | 53 | DIABLO                                        |   | X | 91 | TP53BP2    |   | X |
| 16 | BCL2L10    |   |   | 54 | FADD                                          | X | X | 92 | TP73       |   | X |
| 17 | BCL2L11    |   | X | 55 | FAS                                           |   |   | 93 | TRADD      |   | X |
| 18 | BCL2L2     |   |   | 56 | FASLG                                         | X | X | 94 | TRAF2      | X | X |
| 19 | BFAR       |   |   | 57 | GADD45A                                       |   |   | 95 | TRAF3      | X |   |
| 20 | BID        |   | X | 58 | GUSB (HK)                                     |   |   | 96 | XIAP       |   | X |
| 21 | BIK        |   |   | 59 | HPRT1 (HK)                                    |   |   | 97 | MYD88      | X |   |
| 22 | BIRC2      | X | X | 60 | HRK                                           |   |   | 98 | RIPK1      | X | X |
| 23 | BIRC3      |   | X | 61 | IGF1R                                         |   |   |    |            |   |   |
| 24 | BIRC5      | X |   | 62 | IL10                                          | X |   |    |            |   |   |
| 25 | BIRC6      |   |   | 63 | LDHA (HK)                                     |   |   |    |            |   |   |
| 26 | BNIP2      |   |   | 64 | LTA                                           | X |   |    |            |   |   |
| 27 | BNIP3      |   |   | 65 | LTBR                                          | X |   |    |            |   |   |
| 28 | BNIP3L     |   |   | 66 | MCL1                                          | X |   |    |            |   |   |
| 29 | BRAF       | X |   | 67 | NAIP                                          |   |   |    |            |   |   |
| 30 | CASP1      | X |   | 68 | NFKB1                                         | X |   |    |            |   |   |
| 31 | CASP10     | X |   | 69 | NOD1                                          | X |   |    |            |   |   |
| 32 | CASP14     |   |   | 70 | NOL3                                          |   |   |    |            |   |   |
| 33 | CASP2      | X |   | 71 | PARP1                                         |   |   |    |            |   |   |
| 34 | CASP3      | X | X | 72 | PIDD1                                         |   |   |    |            |   |   |
| 35 | CASP4      | X |   | 73 | POLR1B (HK);<br>excluded in final<br>analysis |   |   |    |            |   |   |
| 36 | CASP5      |   |   | 74 | PRF1                                          |   |   |    |            |   |   |
| 37 | CASP6      |   | X | 75 | PYCARD                                        | X |   |    |            |   |   |
| 38 | CASP7      |   | X | 76 | RIPK2                                         | X |   |    |            |   |   |

**Supplemental Table S2: Cytokine release for the different experimental groups**

Data are presented as mean (SD) in pg/ml. One-way ANOVA for multiple comparisons F, (p).

| <b>Pooled</b>    |                  |                  |                          |                  |                  |                        |                    |
|------------------|------------------|------------------|--------------------------|------------------|------------------|------------------------|--------------------|
| Mean (SD)        | Control          | NETs             | Unstimulated Neutrophils | RSV              | RSV + NETs       | RSV +Unst. Neutrophils | ANOVA              |
| <b>IL-6</b>      | 324.5<br>(182.7) | 363.3<br>(202.2) | 349.9<br>(192.3)         | 1869<br>(1383)   | 1381<br>(1112)   | 1500<br>(1418)         | F 4.884<br>p<0.01  |
| <b>IL-8</b>      | 2729 (709.0)     | 2781<br>(479.0)  | 3364<br>(1111)           | 4468<br>(1340)   | 4440<br>(1390)   | 4622<br>(1673)         | F 4.611<br>p<0.01  |
| <b>IL-9</b>      | 816.2<br>(134.4) | 800.0<br>(117.4) | 841.4<br>(97.0)          | 877.3<br>(189.4) | 792.7<br>(117.5) | 754.6<br>(204.1)       | F 0.6636<br>ns     |
| <b>IL-29</b>     | 429.6<br>(155.2) | 446.2<br>(139.8) | 458.9<br>(164.5)         | 836.6<br>(282.3) | 789.1<br>(347.6) | 872.9<br>(412.4)       | F 5.383<br>p<0.001 |
| <b>RANTES</b>    | 2.631<br>(1.718) | 5.652<br>(3.494) | 7.637<br>(5.396)         | 26.16<br>(20.30) | 35.41<br>(13.40) | 27.44<br>(13.50)       | F 12.68<br>p<0.001 |
| <b>Adult</b>     |                  |                  |                          |                  |                  |                        |                    |
| Mean (SD)        | Control          | NETs             | Unstimulated Neutrophils | RSV              | RSV + NETs       | RSV +Unst. Neutrophils | ANOVA              |
| <b>IL-6</b>      | 131.9<br>(9.5)   | 116.5<br>(8.1)   | 146.8<br>(51.1)          | 2237<br>(1844)   | 1736<br>(1571)   | 2189<br>(1834)         | 2.68<br>ns         |
| <b>IL-8</b>      | 3223<br>(816.5)  | 2784<br>(591.7)  | 3735<br>(1217)           | 4968<br>(1582)   | 5280<br>(1180)   | 5613<br>(1783)         | 3.21<br>P<0.05     |
| <b>IL-9</b>      | 787.7<br>(160.5) | 728.7<br>(42.0)  | 792.9<br>(60.4)          | 755.4<br>(125.5) | 777.4<br>(75.74) | 726.8<br>(113.1)       | 0.34<br>ns         |
| <b>IL-29</b>     | 287.3<br>(84.5)  | 296.1<br>(26.0)  | 316.9<br>(78.8)          | 1013<br>(391.2)  | 865.1<br>(509.1) | 1087<br>(506.4)        | 4.55<br>P<0.01     |
| <b>RANTES</b>    | 1.79<br>(1.97)   | 5.66<br>(1.88)   | 6.25<br>(6.25)           | 42.8<br>(21.9)   | 43.0<br>(14.4)   | 34.0<br>(16.1)         | 8.85<br>P<0.001    |
| <b>Pediatric</b> |                  |                  |                          |                  |                  |                        |                    |
| Mean (SD)        | Control          | NETs             | Unstimulated Neutrophils | RSV              | RSV + NETs       | RSV +Unst. Neutrophils | ANOVA              |
| <b>IL-6</b>      | 468.9<br>(42.5)  | 527.7<br>(78.0)  | 485.3<br>(100.0)         | 1379<br>(62.6)   | 1027<br>(293.7)  | 810.4<br>(245.9)       | 19.8<br>P<0.0001   |
| <b>IL-8</b>      | 2357<br>(363.9)  | 2779<br>(450.5)  | 3117<br>(1072)           | 3801<br>(683.8)  | 3599<br>(1109)   | 3631<br>(856.3)        | 1.91<br>ns         |
| <b>IL-9</b>      | 837.5<br>(132.5) | 847.5<br>(130.2) | 873.8<br>(107.7)         | 968.8<br>(187.7) | 807.9<br>(160.7) | 782.4<br>(287.0)       | 0.60<br>ns         |
| <b>IL-29</b>     | 536.4<br>(89.5)  | 546.3<br>(68.5)  | 553.5<br>(134.6)         | 704.2<br>(53.0)  | 713.2<br>(84.0)  | 658.7<br>(134.9)       | 3.02<br>p<0.05     |
| <b>RANTES</b>    | 3.26<br>(1.45)   | 5.65<br>(4.46)   | 8.56<br>(5.14)           | 13.7<br>(4.25)   | 27.9<br>(7.67)   | 20.9<br>(7.20)         | 13.7<br>P<0.0001   |

**Supplemental Table S3: Directed differential expression (Gene set analysis)**

**Legend:** NETs: neutrophil extracellular traps, US: unstimulated neutrophil supernatant, RSV: respiratory syncytial virus. Ped\*: pediatric.

| Directed Treatment:<br>differential expression | expression in<br>NETS vs.<br>baseline of<br>Control |        | expression in<br>US<br>vs. baseline of<br>Control |       | expression in<br>RSV vs.<br>baseline of<br>Control |        | expression in<br>RSVNETS<br>vs. baseline of<br>Control |        | expression in<br>RSVUS<br>vs. baseline of<br>Control |        |
|------------------------------------------------|-----------------------------------------------------|--------|---------------------------------------------------|-------|----------------------------------------------------|--------|--------------------------------------------------------|--------|------------------------------------------------------|--------|
|                                                | adult                                               | ped*   | adult                                             | ped*  | adult                                              | ped*   | adult                                                  | ped*   | adult                                                | ped*   |
| Cellular responses<br>to stress                | -1,428                                              | -1,117 | -0.395                                            | -1706 | -0.113                                             | 1,355  | -1,377                                                 | -0.506 | -0.289                                               | 0.875  |
| Developmental<br>Biology                       | 0.869                                               | -1,584 | -0.733                                            | -2.4  | 1,218                                              | 0.574  | 0.487                                                  | -1212  | 1,649                                                | -0.804 |
| Generic Transcription<br>Pathway               | 0.962                                               | -2,234 | -0.777                                            | -2393 | 1.51                                               | 0.582  | 0.814                                                  | -2449  | 1,475                                                | -1833  |
| Immune System                                  | 1,432                                               | -1,509 | -0.592                                            | -1925 | 2,663                                              | 0.613  | 2,115                                                  | -1,512 | 2,639                                                | -0.62  |
| Programmed<br>Cell Death                       | 1,368                                               | -1,965 | 0.423                                             | -1952 | 2,292                                              | -0.473 | 1,685                                                  | -2,015 | 2,151                                                | -1.26  |
| Signal Transduction                            | 1,547                                               | -1.92  | 0.561                                             | -2121 | 2.82                                               | 0.608  | 2,159                                                  | -2,027 | 2,796                                                | -1067  |

**Supplemental Table S4: The five most up- or downregulated genes per comparison** are displayed, or more in the case more were significantly up- or downregulated. Legend \* adjusted p <0.05 \*\* adjusted p <0.01, \*\*\* adjusted p <0.001. NETs: neutrophil extracellular traps, US: unstimulated neutrophil supernatant, RSV: respiratory syncytial virus

|                          | Gene      | Log 2 fold change<br>(confidence interval) | Adjusted P                 |
|--------------------------|-----------|--------------------------------------------|----------------------------|
| <b>Adult</b>             |           |                                            |                            |
| Control vs.<br>RSV       | TNFSF10   | 1.42 (1.12 – 2.68)                         | 6.34x10 <sup>-7</sup> ***  |
|                          | MYD88     | 1.04 (0.122 – 0.801)                       | 1.56x10 <sup>-6</sup> ***  |
|                          | CASP1     | 0.927 (0.133 – 0.667)                      | 3.24x10 <sup>-7</sup> ***  |
|                          | FAS       | 0.873 (0.536 – 1.21)                       | 3.43x10 <sup>-5</sup> ***  |
|                          | RIPK1     | 0.527 (0.271 – 0.783)                      | 0.0298*                    |
|                          | CASP7     | 0.311 (0.157 – 0.464)                      | 0.0306*                    |
| Control vs.<br>NETs      | CASP10    | 0.423 (0.108 – 0.211)                      | 0.205                      |
|                          | BIRC2     | 0.375 (0.165 – 0.587)                      | 0.296                      |
|                          | CFLAR     | 0.199 (0.0787 – 0.318)                     | 0.34                       |
|                          | CASP7     | 0.214 (0.0809 – 0.347)                     | 0.34                       |
|                          | BNIP3     | 0.332 (0.0895 – 0.575)                     | 0.692                      |
| Control vs.<br>US        | MCL1      | -0.32 (-0.503 – -0.137)                    | 0.54                       |
|                          | GADD45A   | -0.588(-0.943 – -0.233)                    | 0.54                       |
|                          | FAS       | 0.387 (0.0951 – 0.679)                     | 1                          |
|                          | BCL10     | -0.217 (-0.396 – -0.0386)                  | 1                          |
|                          | APAF1     | -0.198 (-0.383 – -0.0386)                  | 1                          |
| Control vs.<br>RSV +NETs | MYD88     | 0.718 (0.512 – 0.925)                      | 0.000152***                |
|                          | TNSF10    | 0.845 (0.583 – 1.11)                       | 0.000241***                |
|                          | CASP1     | 0.553 (0.328 – 0.779)                      | 0.00713**                  |
|                          | FAS       | 0.552 (0.23 – 0.814)                       | 0.144                      |
|                          | RIPK1     | 0.377 (0.156 – 0.599)                      | 0.172                      |
|                          |           |                                            |                            |
| Control vs.<br>RSV + US  | MYD88     | 0.874( 0.667 – 1.08)                       | 5.37x10 <sup>-6</sup> ***  |
|                          | TNSF10    | 1.01 (0.753 – 1.28)                        | 1.2 x 10 <sup>-5</sup> *** |
|                          | CASP1     | 0.638 (0.413 – 0.864)                      | 0.0011**                   |
|                          | FAS       | 0.638 (0.413 – 0.864)                      | 0.0229*                    |
|                          | RIPK1     | 0.466 (0.113 – 0.245)                      | 0.024*                     |
| <b>Pediatric</b>         |           |                                            |                            |
| Control vs.<br>RSV       | PARP1     | 0.374 (0.165 – 0.584)                      | 0.655                      |
|                          | TNFSRF10B | -0.431 (-0.705 – -0.157)                   | 0.867                      |
|                          | BAG1      | 0.4 (0.0622 – 0.738)                       | 1                          |
|                          | AIFM1     | 0.264 (0.0286 – 0.499)                     | 1                          |
|                          | CASP9     | 0.327 (0.0343 – 0.619)                     | 1                          |
| Control vs.<br>NETs      | TNFSRF10B | -0.703 (-0.948 – -0.458)                   | 0.00376**                  |
|                          | BAX       | -0.5 (-0.682 – -0.318)                     | 0.00376**                  |
|                          | GADD45A   | -0.879 (-1.26 – -0.499)                    | 0.0186*                    |
|                          | MCL1      | -0.274 (-0.432 – -0.115)                   | 0.216                      |
|                          | TP53BP2   | -0.449 ( -0.727 – -0.172)                  | 0.254                      |
| Control vs.<br>US        | TNFSRF10B | -0.703 (-0.959 – -0.446)                   | 0.00774**                  |
|                          | GADD45A   | -1.02 (-1.42 – -0.623)                     | 0.00855**                  |
|                          | BAX       | -0.44 (-0.634 – -0.254)                    | 0.017*                     |
|                          | BRAF      | -0.458 (-0.685 – -0.231)                   | 0.0487*                    |
|                          | CFLAR     | -0.345 (-0.518 – -0.173)                   | 0.0487*                    |
| Control vs.<br>RSV +NETs | TNFSRF10B | -0.764 (-1 – -0.527)                       | 0.00091***                 |
|                          | GADD45A   | -1 (-1.37 – -0.633)                        | 0.00425**                  |
|                          | BAX       | -0.403 (-0.579 – -0.226)                   | 0.0213*                    |
|                          | TP53BP2   | -0.551 (-0.82 – -0.282)                    | 0.0479*                    |
|                          | BCL10     | -0.338 (-0.536 – -0.141)                   | 0.186                      |
|                          |           |                                            |                            |
| Control vs.<br>RSV + US  | TNFSRF10B | -0.72 (-0.957 – -0.483)                    | 0.00207**                  |
|                          | GADD45    | -0.964 (-1.33 – -0.597)                    | 0.00664**                  |
|                          | TNSF10    | 0.798 (0.394 – 1.2)                        | 0.0924                     |
|                          | PARP1     | 0.32 (0.139 – 0.502)                       | 0.163                      |
|                          | TP53BP2   | -0.467 (-0.736 – -0.199)                   | 0.163                      |

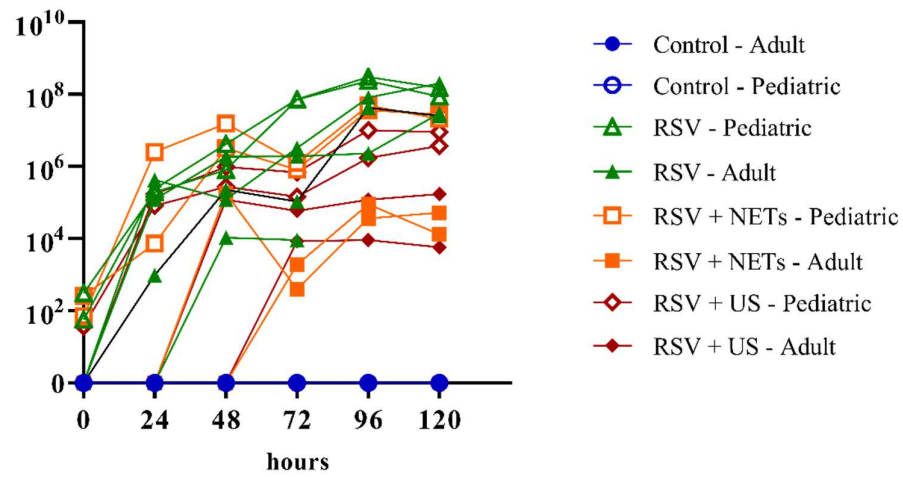

**Supplemental Figure S1: RSV replication in HAE cultures by RT-qPCR in adult and pediatric HAE cultures.** Control: uninfected control, RSV: RSV infection only, RSV +NETs: RSV infected and NETs supernatant added at 48 hours, RSV + US: RSV infected and unstimulated neutrophil supernatant added at T48 hours. All RSV infected HAE cultures were infected at T0.

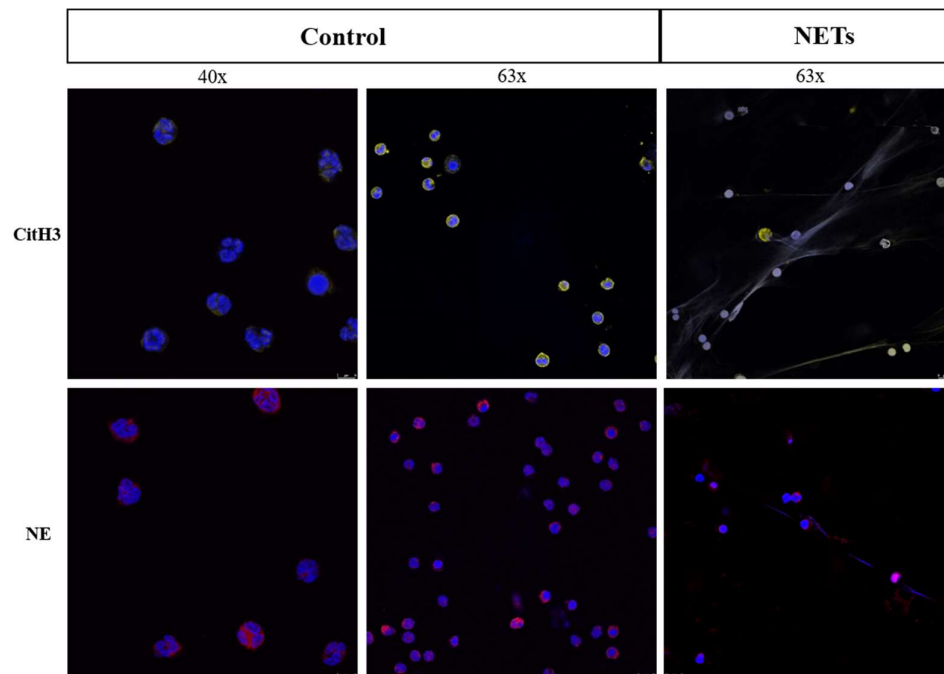

**Supplemental Figure S2: Confocal Images of Unstimulated Neutrophils and NETs**

**Legend:** Upper row: neutrophils and NETs stained for Citrullinated Histone 3 (yellow), lower row neutrophil elastase (NE, magenta), and DNA (DAPI, blue).
